# Supplementary material for: Temperature induced structural and polarization features in BaFe12O19
Source: Royal Society of Chemistry journal article supplement (doi:10.1039/d3tc01533e), 2023-01-01
Supplement: d3tc01533e1.pdf [file d3tc01533e1.pdf]

## Temperature induced structural and polarization features in BaFe<sub>12</sub>O<sub>19</sub>

*Dmitry B. Migas<sup>a,b</sup>, Vitaliy A. Turchenko<sup>c</sup>, A.V. Rutkauskas<sup>c</sup>, Sergey V. Trukhanov<sup>d,e</sup>, Tatiana I. Zubar<sup>d</sup>, Daria I. Tishkevich<sup>d</sup>, Alex V. Trukhanov<sup>d,e,f\*</sup>, Natalia V. Skorodumova<sup>g</sup>*

---

<sup>a.</sup> Belarusian State University of Informatics and Radioelectronics, P. Browka 6, 220013 Minsk, Belarus

<sup>b.</sup> National Research Nuclear University MEPhI (Moscow Engineering Physics Institute), Kashirskoe shosse 31, 115409 Moscow, Russia

<sup>c.</sup> Joint Institute for Nuclear Research, 6 Joliot-Curie Str., Dubna, 141980, Russia

<sup>d.</sup> SSPA Scientific-Practical Materials Research Centre of the NAS of Belarus, Minsk, 220072, Belarus

<sup>e.</sup> Smart Sensors Laboratory, NUST MISiS, Moscow, 119049, Russia

<sup>f.</sup> L.N. Gumilyov Eurasian National University, Astana, 010000, Kazakhstan

<sup>g.</sup> Department of Materials and Engineering, Royal Institute of Technology (KTH), SE-10044 Stockholm

SUPPLEMENTARY INFORMATION

TABLE T1. Rietveld refinement parameters obtained from the NPD for  $\text{BaFe}_{12}\text{O}_{19}$  at 40 and 290 K and optimized by the first principal calculations.

|                         |               | Exp 40 K    | Exp 290 K   | HSE (1/4, 3/4) | HSE (0.258, 0.758) |
|-------------------------|---------------|-------------|-------------|----------------|--------------------|
| Ba (2d)                 | <i>z</i>      | 1/4         | 1/4         | 1/4            | 0.2490             |
| Fe1 (2a)                | <i>z</i>      | 0           | 0           | 0              | 0.0003             |
| Fe2 (2a)                | <i>z</i>      | 1/4         | 1/4         | 1/4            | 0.2579             |
| Fe3 (4f <sub>IV</sub> ) | <i>z</i>      | 0.0256(9)   | 0.0278(6)   | 0.0272         | 0.0272             |
| Fe4 (4f <sub>VI</sub> ) | <i>z</i>      | 0.1917(8)   | 0.1897(5)   | 0.1903         | 0.1904             |
| Fe5 (12k)               | <i>x</i>      | 0.1703(34)  | 0.1775(26)  | 0.1686         | 0.1694             |
|                         | <i>z</i>      | -0.1072(4)  | -0.1082(3)  | -0.1082        | -0.1077            |
| O1 (4e)                 | <i>z</i>      | 0.1592(16)  | 0.1548(11)  | 0.1508         | 0.1487             |
| O2 (4f)                 | <i>z</i>      | -0.0618(16) | -0.0569(11) | -0.0547        | -0.0548            |
| O4 (12k)                | <i>x</i>      | 0.1527(44)  | 0.1538(28)  | 0.15674        | 0.1572             |
|                         | <i>z</i>      | 0.0514(6)   | 0.0524(4)   | 0.0519         | 0.0515             |
| O5 (12k)                | <i>x</i>      | 0.5149(42)  | 0.5163(30)  | 0.5021         | 0.5019             |
|                         | <i>z</i>      | 0.1490(7)   | 0.1513(5)   | 0.1491         | 0.1493             |
| Relevance factors       | $R_{wp}$ , %  | 9.98        | 7.01        |                |                    |
|                         | $R_{exp}$ , % | 3.83        | 3.98        |                |                    |
|                         | $R_B$ , %     | 9.34        | 2.74        |                |                    |
|                         | $R_{Mag}$ , % | 3.90        | 1.47        |                |                    |
|                         | $\chi^2$      | 6.80        | 3.10        |                |                    |

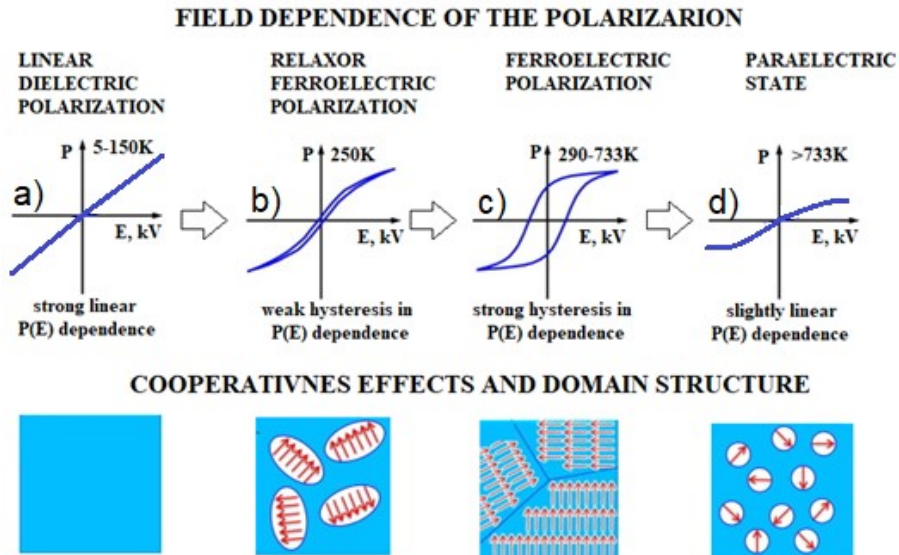

FIG. S1 Schematic illustration of the P(E) and domain structure behavior at different temperatures.

TABLE T2. Charge redistribution among ions in  $\text{BaFe}_{12}\text{O}_{19}$

| Ba        | Fe1       | Fe2       | Fe3       | Fe4       | Fe5       | O                   |
|-----------|-----------|-----------|-----------|-----------|-----------|---------------------|
| $1.64e^-$ | $1.92e^-$ | $1.76e^-$ | $1.84e^-$ | $1.94e^-$ | $1.90e^-$ | $1.25e^- - 1.30e^-$ |

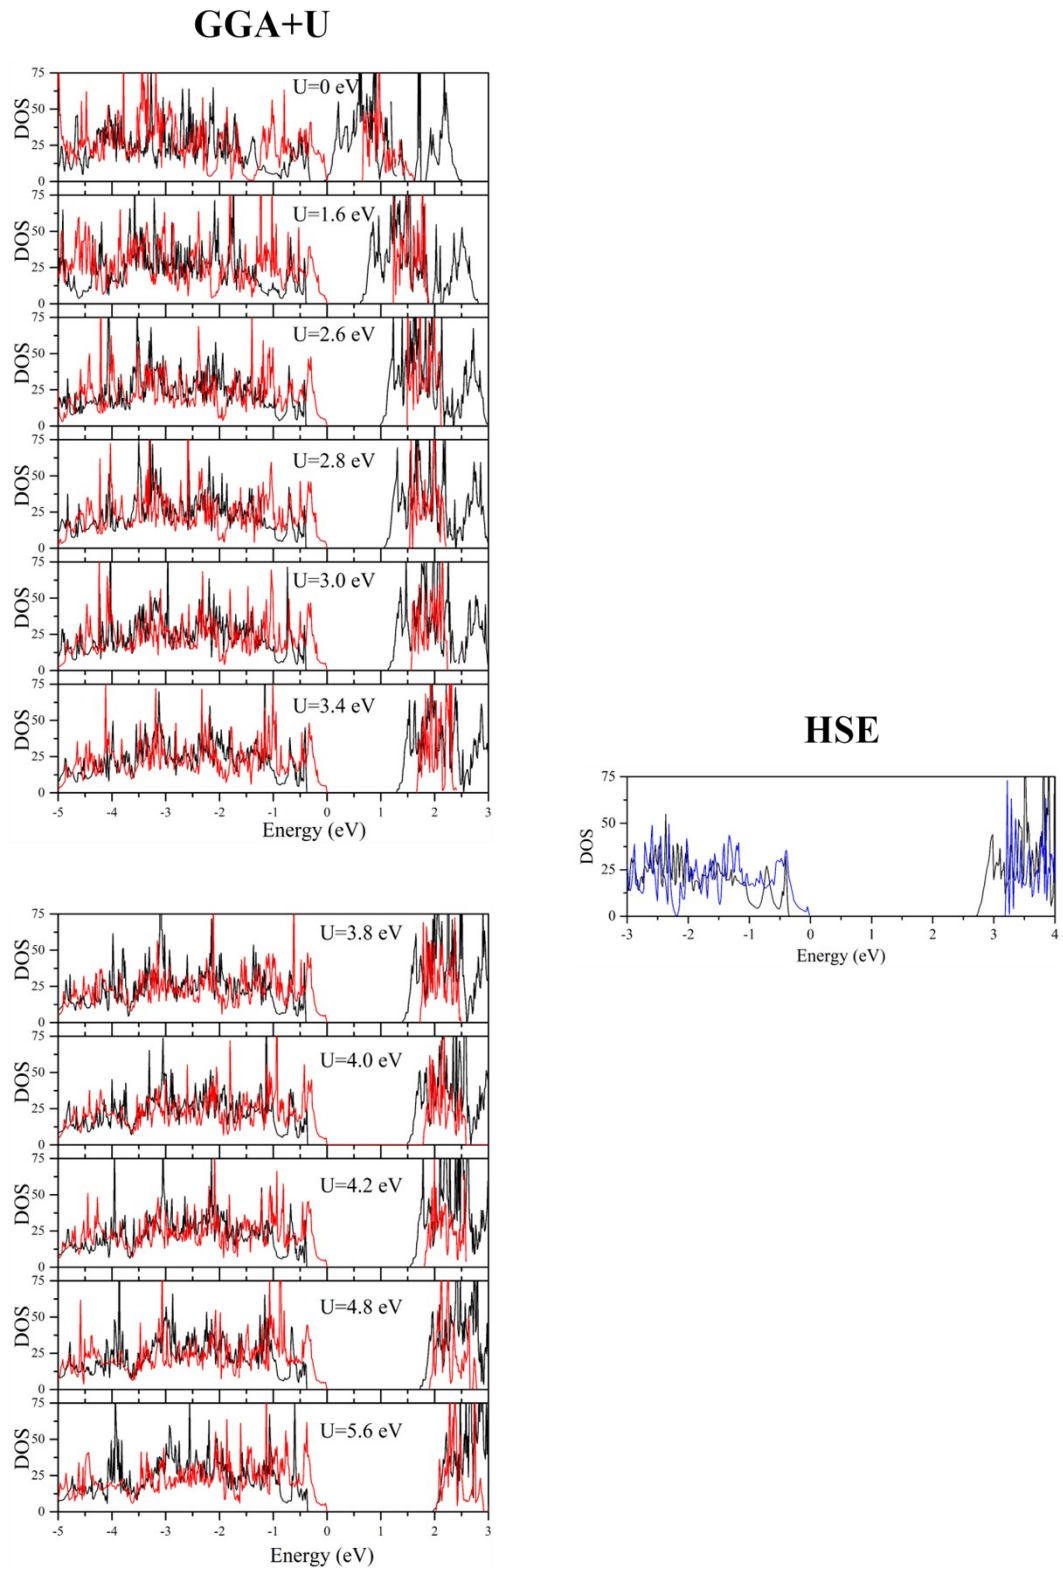

FIG. S2. Total density of states of  $\text{BaFe}_{12}\text{O}_{19}$  as calculated by HSE and GGA+U ( $0 \text{ eV} < U < 5.6 \text{ eV}$ ) for different spin polarization. Zero at the energy scale corresponds to the top of the valence band.

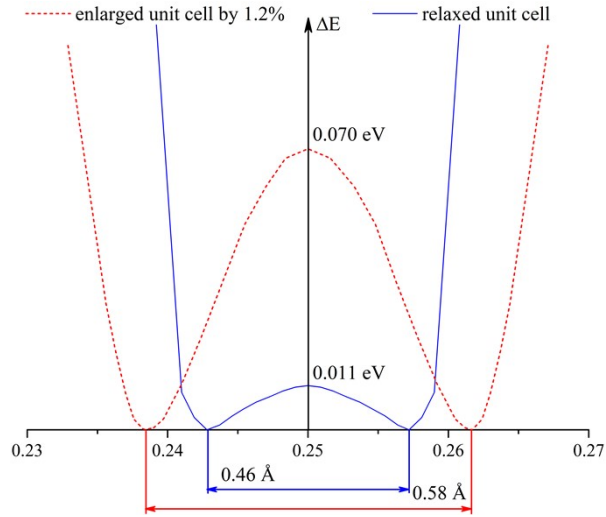

FIG. S3. The potential relief for the Fe2 ions around  $z=1/4$  ( $z=3/4$ ) for the fully relaxed and enlarged in volume unit cells by NEB within GGA+U with  $U=2.8$  eV when moving two Fe2 atoms. The energy barriers and the distance of the Fe2 ion shift are indicated.

TABLE T3. Changes in atomic positions and interatomic distances in the  $\text{FeO}_5$  trigonal bipyramid with the displacement of the Fe atom from  $z=1/4$  to  $z=0.259$ .

|            |     | $z=1/4$ |       |       | $z=0.256$ |       |       | $z=0.259$ |       |       |
|------------|-----|---------|-------|-------|-----------|-------|-------|-----------|-------|-------|
|            |     | $x$     | $y$   | $z$   | $x$       | $y$   | $z$   | $x$       | $y$   | $z$   |
|            | Fe2 | 0       | 0     | 1/4   | 0         | 0     | 0.256 | 0         | 0     | 0.259 |
| equatorial | O   | 0.182   | 0.364 | 1/4   | 0.182     | 0.363 | 0.251 | 0.181     | 0.362 | 0.251 |
|            | O   | 0.182   | 0.818 | 1/4   | 0.182     | 0.818 | 0.251 | 0.181     | 0.819 | 0.251 |
|            | O   | 0.636   | 0.818 | 1/4   | 0.637     | 0.818 | 0.251 | 0.637     | 0.819 | 0.251 |
| polar      | O   | 0       | 0     | 0.151 | 0         | 0     | 0.149 | 0         | 0     | 0.149 |
|            | O   | 0       | 0     | 0.349 | 0         | 0     | 0.349 | 0         | 0     | 0.349 |
|            |     |         |       |       |           |       |       |           |       |       |

TABLE T4. Atomic coordinates of BaFe<sub>12</sub>O<sub>19</sub> determined with the Rietveld method in the framework of: SG *P6<sub>3</sub>/mmc* (#194), SG *P6<sub>3</sub>mc* (#186) and SG *P6<sub>3</sub>22* (#182).

| Composition<br>Atomic positions | SG#194     |                     | SG#186      |               | SG#182      |                     |
|---------------------------------|------------|---------------------|-------------|---------------|-------------|---------------------|
|                                 | T, K       |                     |             |               |             |                     |
|                                 | 40 K       | 290 K               | 40 K        | 290 K         | 40 K        | 290 K               |
| <b>Ba</b>                       |            | (2d)                |             | (2b)          |             | (2d)                |
| z                               | 0.25       | 0.25                | 0.2427(70)  | 0.2501(83)    | 0.25        | 0.25                |
| <b>Fe1 (2a)</b>                 |            |                     |             |               |             |                     |
| z                               | 0          | 0                   | -0.0108(45) | -0.0089       | 0           | 0                   |
| <b>Fe2</b>                      |            | (2b)                |             | (2a)          |             | (2b)                |
| z                               | 0.25       | 0.25                | 0.2297(37)  | 0.2448(61)    | 0.25        | 0.25                |
| <b>Fe3</b>                      |            | (4f <sub>IV</sub> ) |             | (2b)          |             | (4f <sub>IV</sub> ) |
| z                               | 0.0256(9)  | 0.0278(6)           | 0.0102(41)  | 0.02516( 544) | 0.0261(9)   | 0.0258(6)           |
| <b>Fe33 (2b)</b>                |            |                     |             |               |             |                     |
| z                               | --         | --                  | 0.4658(32)  | 0.4658(63)    | --          | --                  |
| <b>Fe4</b>                      |            | (4f <sub>VI</sub> ) |             | (2b)          |             | (4f <sub>VI</sub> ) |
| z                               | 0.1917(8)  | 0.1897(5)           | 0.1842(32)  | 0.1846(46)    | 0.1915(7)   | 0.1893(4)           |
| <b>Fe44(2b)</b>                 |            |                     |             |               |             |                     |
| z                               | --         | --                  | 0.2967(35)  | 0.3046(45)    | --          | --                  |
| <b>Fe5</b>                      |            | (12k)               |             | (6c)          |             | (12i)               |
| x                               | 0.1703(34) | 0.1775(26)          | 0.1606(72)  | 0.1737(64)    | 0.1522(41)  | 0.1814(86)          |
| y                               | --         | --                  | --          | --            | 0.3435(34)  | 0.3559(21)          |
| z                               | -0.1072(4) | -0.1082(3)          | 0.8785(35)  | 0.8825(43)    | -0.1072(4)  | -0.1079(3)          |
| <b>Fe55 (6c)</b>                |            |                     |             |               |             |                     |
| x                               | --         | --                  | 0.1763(42)  | 0.1853(43)    | --          | --                  |
| z                               | --         | --                  | 0.5955(38)  | 0.5999(41)    | --          | --                  |
| <b>O1</b>                       |            | (4e)                |             | (2a)          |             | (4e)                |
| z                               | 0.1592(16) | 0.1548(11)          | 0.1472(42)  | 0.1498(39)    | 0.1603(16)  | 0.1544(9)           |
| <b>O11 (2a)</b>                 |            |                     |             |               |             |                     |
| z                               | --         | --                  | 0.3367(53)  | 0.3479(50)    | --          | --                  |
| <b>O2</b>                       |            | (4f)                |             | (2b)          |             | (4f)                |
| z                               | -          | -                   | 0.9099(48)  | 0.9321(57)    | -0.0608(16) | -0.0572(10)         |
| <b>O22 (2b)</b>                 |            |                     |             |               |             |                     |
| z                               | 0.0618(16) | 0.0569(11)          |             |               |             |                     |
| <b>O3</b>                       |            | (6h)                |             | (6c)          |             | (6h)                |
| x                               | 0.1474(52) | 0.1426(37)          | 0.1413(57)  | 0.1544(93)    | 0.1539(54)  | 0.1436(31)          |
| z                               | 0.25       | 0.25                | 0.2519(36)  | 0.2529(41)    | 0.25        | 0.25                |
| <b>O4</b>                       |            | (12k)               |             | (6c)          |             | (12i)               |
| x                               | 0.1527(44) | 0.1538(28)          | 0.1526(68)  | 0.1592(118)   | 0.1534(75)  | 0.1499              |
| y                               | --         | --                  | --          | --            | 0.3048(41)  | 0.3123(27)          |
| z                               | 0.0514(6)  | 0.0524(4)           | 0.0422(38)  | 0.0484(36)    | 0.0523(6)   | 0.0519(4)           |
| <b>O44 (6c)</b>                 |            |                     |             |               |             |                     |
| x                               | --         | --                  | 0.1477      | 0.1476(103)   | --          | --                  |
| z                               | --         | --                  | 0.4397(34)  | 0.4406(44)    | --          | --                  |
| <b>O5</b>                       |            | (12k)               |             | (6c)          |             | (12i)               |
| x                               | 0.5149(42) | 0.5163(30)          | 0.5269(65)  | 0.5319(79)    | 0.5005      | 0.5217(192)         |
| y                               | --         | --                  | --          | --            | 1.0258(38)  | 1.0377              |
| z                               | 0.1490(7)  | 0.1513(5)           | 0.1523(45)  | 0.1520(38)    | 0.14930(74) | 0.1505(5)           |
| <b>O55 (6c)</b>                 |            |                     |             |               |             |                     |
| x                               | --         | --                  | 0.4990(99)  | 0.4853(102)   | --          | --                  |
| z                               | --         | --                  | 0.3467(35)  | 0.3454(45)    | --          | --                  |
| R <sub>wp</sub> , %             | 9.98       | 7.01                | 8.64        | 6.92          | 9.43        | 7.26                |
| R <sub>exp</sub> , %            | 3.83       | 3.98                | 3.81        | 3.95          | 3.82        | 3.99                |
| R <sub>B</sub> , %              | 9.34       | 2.74                | 4.91        | 2.29          | 8.25        | 3.95                |
| R <sub>Mag</sub> , %            | 3.90       | 1.47                | 3.03        | 1.29          | 2.35        | 2.89                |
| χ <sup>2</sup>                  | 6.80       | 3.10                | 5.15        | 3.06          | 6.09        | 3.31                |
